# Supplementary material for: Force-dependent binding of vinculin to α-catenin regulates cell–cell contact stability and collective cell behavior
Source: PubMed Central journal article supplement — Mol Biol Cell. 2018 Feb 15;29(4):380–8. doi: 10.1091/mbc.E17-04-0231 (PMC6014167; doi:10.1091/mbc.e17-04-0231), 2018-02-15

# Supplemental Materials

*Molecular Biology of the Cell*

Seddiki et al.

## Supplementary figure Legends

### **Figure S1: Anti-vinculin and F-actin staining taken at the cell-substratum interface of $\alpha$ -catenin KD MDCK cells expressing wt or $\alpha$ -catenin mutants**

Anti-vinculin immunostaining and phalloidin staining of  $\alpha$ E-catenin KD MDCK cells expressing  $\alpha$ -cat-WT-GFP,  $\alpha$ -cat-L334P-GFP or  $\alpha$ -cat- $\Delta$ mod-GFP. Panels show confocal sections taken at the most ventral position in the cell layers. The expression of mutant proteins does not impact the distribution of vinculin and F-actin at the cell-substratum interface. Scale bar: 5  $\mu$ m.

### **Figure S2: Blebbistatin treatment does not displace vinculin from cell-cell contacts of $\alpha$ -cat- $\Delta$ mod-GFP expressing cells (A)**

Anti-vinculin immunostaining was performed on  $\alpha$ E-catenin KD MDCK cells expressing  $\alpha$ -cat-WT-GFP or  $\alpha$ -cat- $\Delta$ mod-GFP grown on glass substrates. Panels show confocal sections taken at the apical cell domain of the monolayers. While vinculin staining was lost from cell-cell contacts of  $\alpha$ -cat-WT-GFP expressing cells after blebbistatin treatment (20  $\mu$ M, 2 hours), it persists in blebbistatin treated  $\alpha$ -cat- $\Delta$ mod-GFP expressing cells. Scale bar: 10  $\mu$ m. (B) Quantification of the vinculin/ $\alpha$ -catenin intensity ratio measure by line scan over cell-cell contacts (mean values  $\pm$  SD, \*\*\*\*  $p < 0.001$ , ns: non-significant, one-way ANOVA test).

### **Figure S3: The typical half recovery time for the $\alpha$ -cat mutants were not significantly different and did not depend on substrate stiffness. (A)**

FRAP experiments performed on cell-cell contacts of  $\alpha$ -cat-WT-GFP,  $\alpha$ -cat-L334P-GFP or  $\alpha$ -cat- $\Delta$ mod-GFP expressing cells grown on glass substrates. Means of recovery characteristic times  $t_{1/2} \pm$  SEM of experiments presented in Figure 2 C,D. ns: non-significant, one-way ANOVA test. (B) FRAP experiments performed on MDCK  $\alpha$ -catenin-KD cells expressing GFP-tagged wt  $\alpha$ -catenin (green),  $\alpha$ -cat-

L334P (blue) or  $\alpha$ -cat- $\Delta$ mod (red) cultured for 24 hours on 4.5 (light colors) or 35 kPa (dark colors) PPA gels. Graphs represent means of recovery characteristic times  $t_{1/2} \pm$  SEM of experiments presented in Figure 3 A,B. ns: non-significant, two-way ANOVA test.

**Figure S4: The junctional stability of E-cadherin does not depend on  $\alpha$ -catenin mutation or on substrate stiffness.** (A, B) FRAP experiments were performed on E-cadherin-dsRed at cell-cell contacts of  $\alpha$ E-catenin KD MDCK transfecting with  $\alpha$ -cat-WT-GFP or  $\alpha$ -cat-L334P-GFP expressing and coexpressing E-cadherin-dsRed. (A) Fluorescence recovery over time ( $\pm$  SEM,  $n \geq 50$  out of 3 independent experiments for each condition) fitted with a one-term exponential equation. (B) Mobile fraction values (mean values  $\pm$  SD and 95<sup>th</sup> percentile) extracted from the fits of individual recovery curves considered in panels A. ns: non-significant, unpaired t-test. (C) FRAP experiments were performed at cell-cell contacts of E-cadherin-GFP expressing MDCK cells spread on substrates of controlled rigidity (2 and 5 kPa, respectively). Curves represent Mean GFP fluorescence recovery over time ( $\pm$  SEM,  $n \geq 50$  out of 3 independent experiments for each condition) fitted with a one-term exponential equation.

**Movie 1:** MDCK cells silenced for  $\alpha$ -catenin ( $\alpha$ -cat KD) seeded on 500  $\mu$ m  $\emptyset$  FN patterns and phase contrast imaged for 16 hours.

**Movie 2:**  $\alpha$ -cat KD MDCK cells expressing  $\alpha$ -cat-L334P seeded on 500  $\mu$ m  $\emptyset$  FN patterns and phase contrast imaged for 16 hours.

**Movie 3:**  $\alpha$ -cat KD MDCK cells expressing GFP-tagged  $\alpha$ -cat-wt seeded on 500  $\mu$ m  $\emptyset$  FN patterns and phase contrast imaged for 16 hours.

**Movie 4:**  $\alpha$ -cat KD MDCK cells expressing  $\alpha$ -cat- $\Delta$ mod seeded on 500  $\mu$ m  $\emptyset$  FN patterns and phase contrast imaged for 16 hours.

**Movie 5:** RFP-Ftractin expressing  $\alpha$ -cat KD cells seeded on 500  $\mu$ m  $\emptyset$  FN patterns and phase contrast imaged for 16 hours.

**Movie 6:** RFP-Ftractin expressing  $\alpha$ -cat-L334P cells seeded on 500  $\mu$ m  $\emptyset$  FN patterns and phase contrast imaged for 16 hours.

**Movie 7:** RFP-Ftractin expressing  $\alpha$ -cat-wt cells seeded on 500  $\mu$ m  $\emptyset$  FN patterns and phase contrast imaged for 16 hours.

**Movie 8:** RFP-Ftractin expressing  $\alpha$ -cat- $\Delta$ mod cells seeded on 500  $\mu$ m  $\emptyset$  FN patterns and phase contrast imaged for 16 hours.

Figure S1: Seddiki

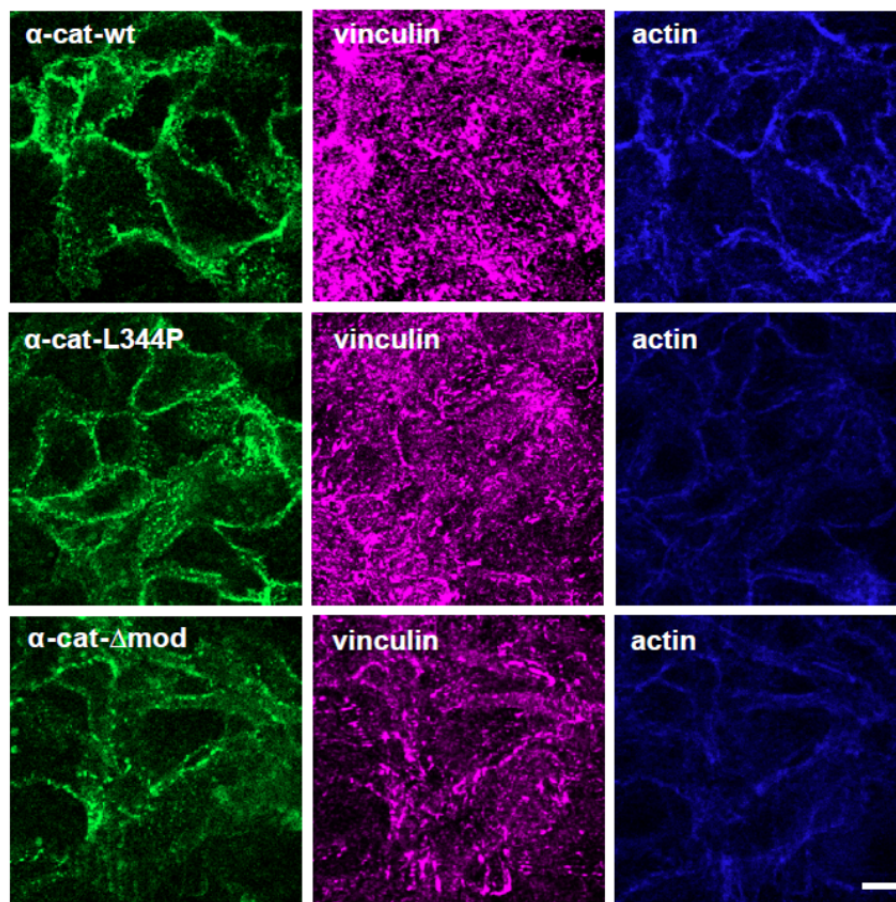

Figure S2: Seddiki

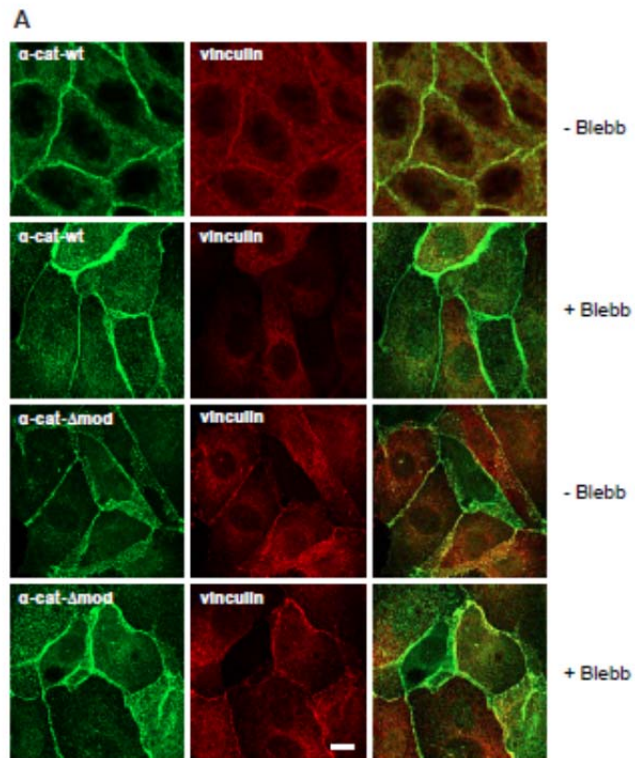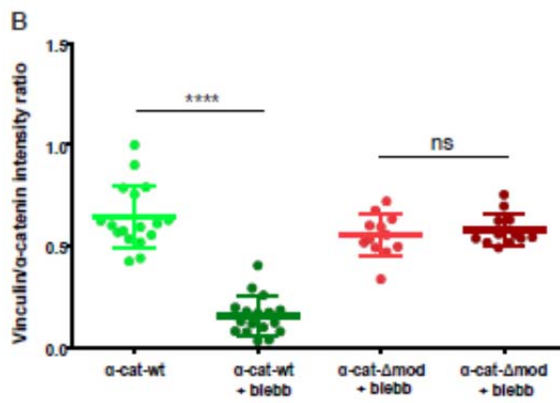

Figure S3: Seddiki

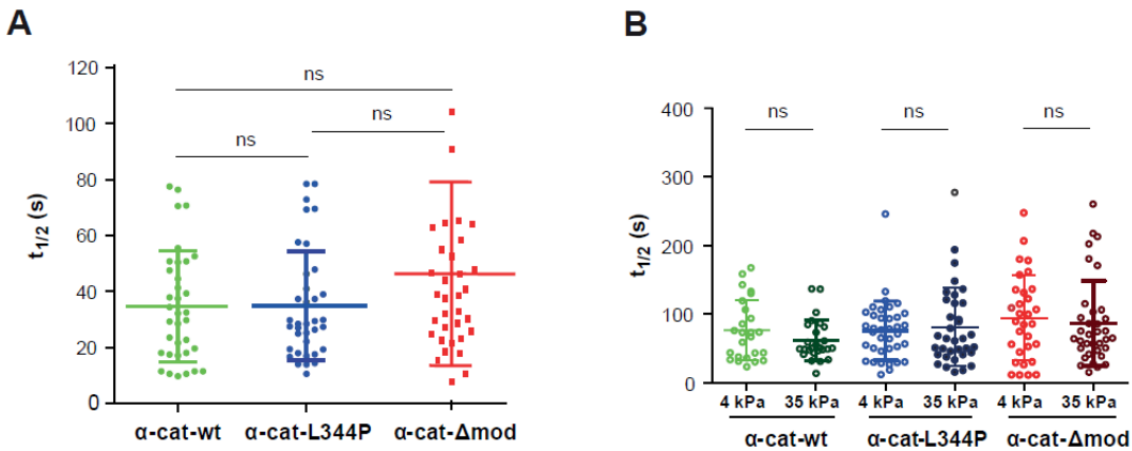

Figure S4: Seddiki

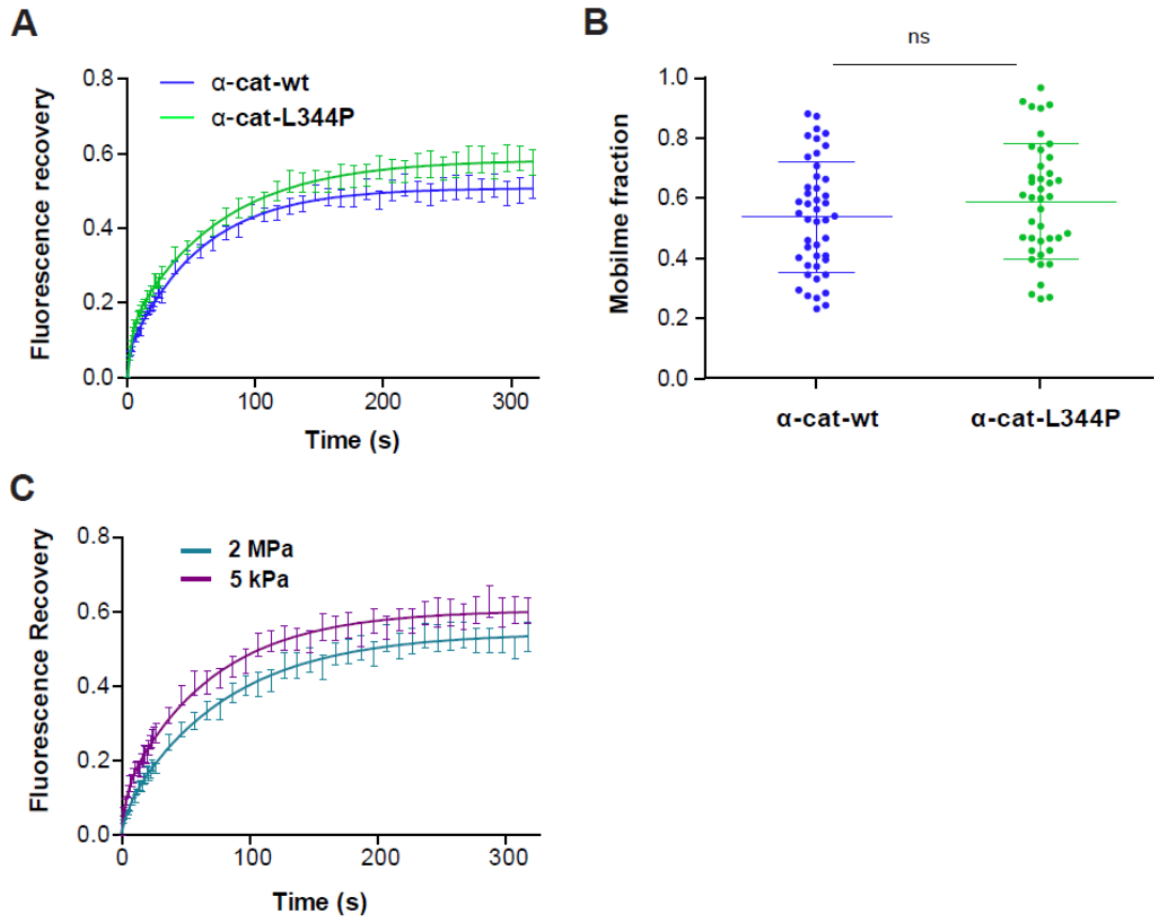

Supplement: mbc-29-380-s001.pdf [file mbc-29-380-s001.pdf]
